# Supplementary material for: Enhanced Congo red dye removal from aqueous solutions using iron nanoparticles: adsorption, kinetics, and equilibrium studies
Source: Royal Society of Chemistry journal article supplement (doi:10.1039/c7dt02076g), 2017-01-01
Supplement: c7dt02076g1.pdf [file c7dt02076g1.pdf]

## Supporting Information

### Enhanced congo red dye removal from aqueous solutions using iron nanoparticles: adsorption, kinetics, and equilibrium studies

Se-Ho Kim<sup>a</sup> and Pyuck-Pa Choi<sup>\*a</sup>

<sup>a</sup>Department of Materials Science and Engineering, Korea Advanced Institute of Science and  
Technology (KAIST), 291 Daehak-ro, Yuseong-gu, Daejeon, 34141, Republic of Korea.

E-mail: sehonetkr@kaist.ac.kr; p.choi@kaist.ac.kr

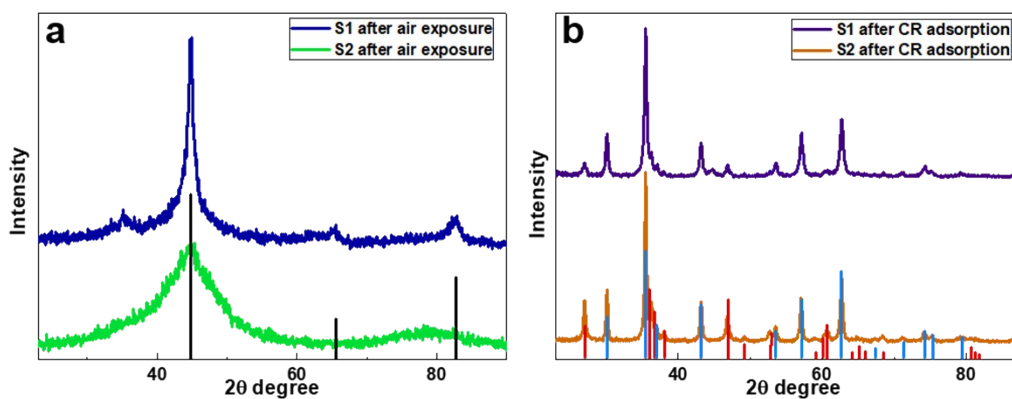

**Figure S11.** XRD patterns of S1 and S2 samples exposed for 5 days. b) XRD patterns of S1 (orange) and S2 (purple) after CR adsorption. Red and blue lines mark the powder diffraction data for lepidocrocite (FeOOH) and magnetite (Fe<sub>3</sub>O<sub>4</sub>), respectively.

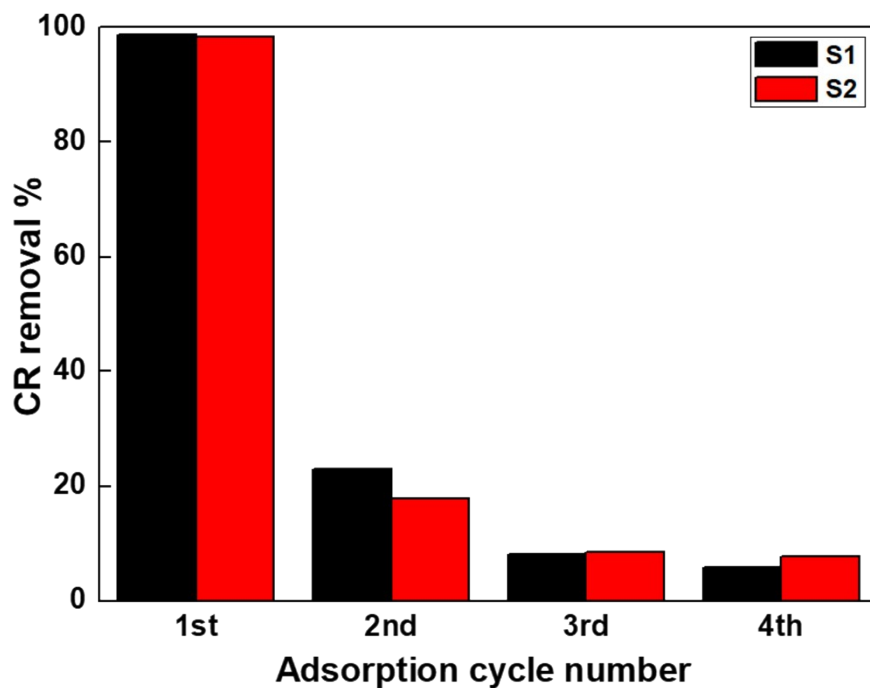

**Figure S12.** CR removal efficiency versus number of adsorption cycles of S1 and S2.

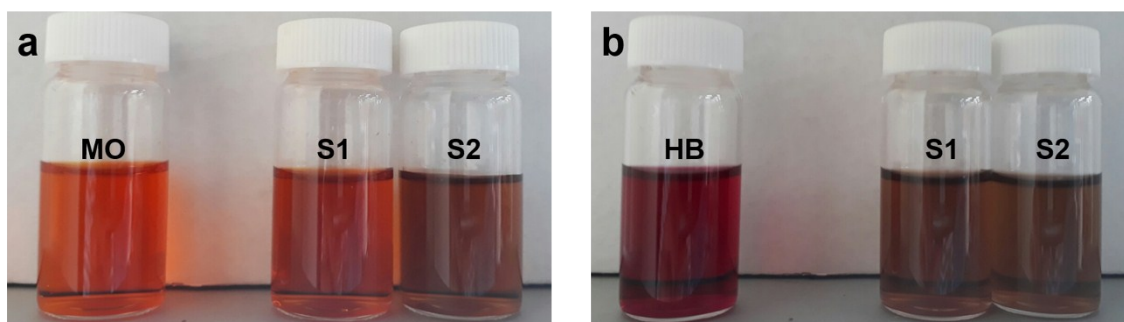

**Figure S13.** a) 125 ppm of methyl orange (MO) solution and the solution after dye adsorption using S1 and S2 nanoparticles. b) 125ppm of hydroxyl-naphthol blue (HB) solution and after dye adsorption using S1 and S2 nanoparticles.

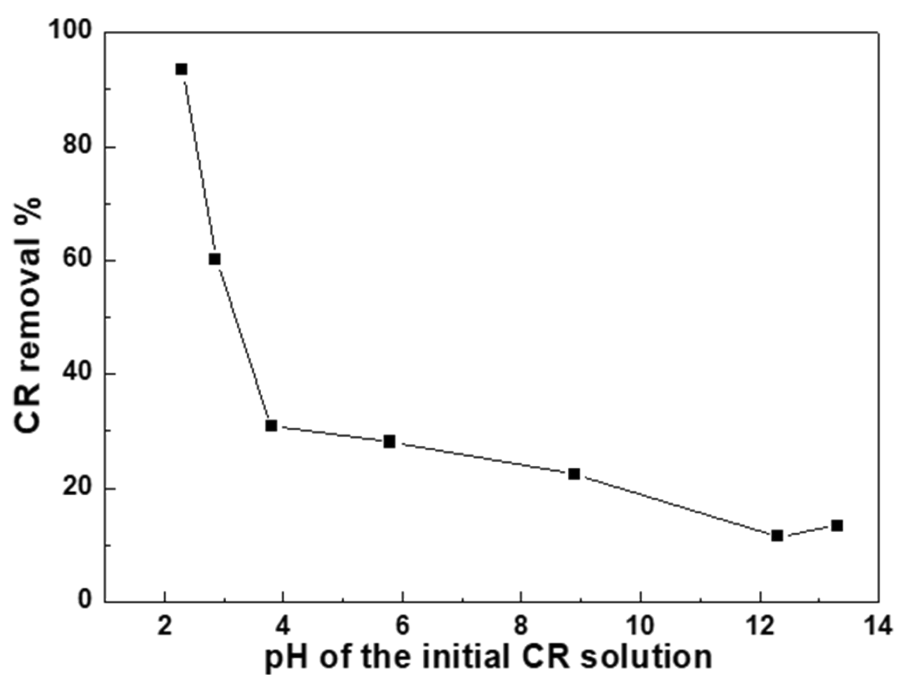

**Figure S14.** Effect of the pH value of the CR solution on the adsorption of CR by (S2) amorphous iron nanoparticles.
